# Supplementary material for: Thinking Preferences and Conspiracy Belief: Intuitive Thinking and the Jumping to Conclusions-Bias as a Basis for the Belief in Conspiracy Theories
Source: PubMed Central journal article supplement (PMC7530244; doi:10.3389/fpsyt.2020.568942), 2020-09-18
Supplement: DataSheet_1.pdf [file DataSheet_1.pdf]

## Supplement

# Thinking preferences and conspiracy belief: intuitive thinking and the jumping to conclusions-bias as a basis for the belief in conspiracy theories

This supplement contains supporting information for the above-mentioned manuscript. The results of complementary analyses are reported, the findings are discussed in the main document.

### **Additional Analyses: Controlling for Age and Gender (men vs. women)**

- 2 **Table S1.** *Means and Standard Deviations of Cognitive Measures (CB, Thinking Styles) and JTC Measures*
- 2 **Table S2.** *ANCOVA Results for Comparisons of Participants Regarding Conspiracy Belief*
- 2 **Table S3.** *ANCOVA Results for Comparisons of Participants Regarding their Preference for Intuitive Thinking (FI-score)*
- 2 **Table S4.** *ANCOVA Results for Comparisons of Participants Regarding their Preference for Analytic Thinking (NC-score)*
- 3 **Table S5.** *Associations between Conspiracy Belief, Thinking Styles and the JTC-bias controlling for Age and Gender*
- 3 **Table S6.** *Results of the Multiple Regression Analysis controlling for Age and Gender*

### **Additional Analyses: Controlling for Age and Gender (total sample)**

- 4 **Table S7.** *Means and Standard Deviations of Cognitive Measures (CB, Thinking Styles) and JTC Measures*
- 4 **Table S8.** *ANCOVA Results for Comparisons of Participants Regarding Conspiracy Belief*
- 4 **Table S9.** *ANCOVA Results for Comparisons of Participants Regarding their Preference for Intuitive Thinking (FI-score)*
- 4 **Table S10.** *ANCOVA Results for Comparisons of Participants Regarding their Preference for Analytic Thinking (NC-score)*
- 5 **Table S11.** *Associations between Conspiracy Belief, Thinking Styles and the JTC-bias controlling for Age and Gender*
- 5 **Table S12.** *Results of the Multiple Regression Analysis controlling for Age and Gender*

## Results of the additional analyses controlling for age and gender (including only men and women)

**Table S1.**

*Means and Standard Deviations of Cognitive Measures (CB, Thinking Styles) and JTC Measures*

|                           | Total sample<br>( <i>N</i> = 479) | JTC yes ( <i>n</i> = 67) | JTC no ( <i>n</i> = 412) |
|---------------------------|-----------------------------------|--------------------------|--------------------------|
|                           | <i>M</i> ( <i>SD</i> )            | <i>M</i> ( <i>SD</i> )   | <i>M</i> ( <i>SD</i> )   |
| Conspiracy Belief         | 2.63 (.76)                        | 2.58 (.74)               | 2.98 (.81)               |
| <i>Cognitive measures</i> |                                   |                          |                          |
| Faith in Intuition Scale  | 61.45 (12.21)                     | 66.26 (12.51)            | 60.66 (11.99)            |
| Need for Cognition Scale  | 70.69 (13.22)                     | 65.10 (16.17)            | 71.61 (12.46)            |
| <i>JTC measures</i>       |                                   |                          |                          |
| Draws to decision         | 4.56 (2.35)                       | 1.44 (.50)               | 5.24 (2.04)              |

Note: JTC = jumping to conclusions

**Table S2.**

*ANCOVA Results for Comparisons of Participants Regarding Conspiracy Belief*

| Results | <i>df</i> | <i>SS</i> | <i>MS</i> | <i>F</i> | <i>p</i> | <i>partial η</i> <sup>2</sup> |
|---------|-----------|-----------|-----------|----------|----------|-------------------------------|
| Age     | 1         | 3.000     | 3.000     | 5.357    | .021     | .011                          |
| Gender  | 1         | 1.520     | 1.520     | 2.714    | .100     | .006                          |
| JTC     | 1         | 7.903     | 7.903     | 14.113   | <.001    | .029                          |
| Error   | 475       | 265.993   | .560      |          |          |                               |
| Total   | 479       | 3602.543  |           |          |          |                               |

Note: JTC = jumping to conclusions; SS = sum of squares; MS = mean square.

**Table S3.**

*ANCOVA Results for Comparisons of Participants Regarding their Preference for Intuitive Thinking (FI-score)*

| Results | <i>df</i> | <i>SS</i>   | <i>MS</i> | <i>F</i> | <i>p</i> | <i>partial η</i> <sup>2</sup> |
|---------|-----------|-------------|-----------|----------|----------|-------------------------------|
| Age     | 1         | 722.870     | 722.870   | 5.092    | .024     | .011                          |
| Gender  | 1         | 1050.262    | 1050.262  | 7.398    | .007     | .015                          |
| JTC     | 1         | 1845.452    | 1845.452  | 12.999   | <.001    | .026                          |
| Error   | 479       | 68003.251   | 141.969   |          |          |                               |
| Total   | 483       | 1895569.000 |           |          |          |                               |

Note: JTC = jumping to conclusions; SS = sum of squares; MS = mean square.

**Table S4.**

*ANCOVA Results for Comparisons of Participants Regarding their Preference for Analytic Thinking (NC-score)*

| Results | <i>df</i> | <i>SS</i>   | <i>MS</i> | <i>F</i> | <i>p</i> | <i>partial η</i> <sup>2</sup> |
|---------|-----------|-------------|-----------|----------|----------|-------------------------------|
| Age     | 1         | 1103.572    | 1103.572  | 6.750    | .010     | .014                          |
| Gender  | 1         | 1943.451    | 1943.451  | 11.887   | .001     | .024                          |
| JTC     | 1         | 2462.353    | 2462.353  | 15.061   | <.001    | .030                          |
| Error   | 479       | 78314.892   | 163.497   |          |          |                               |
| Total   | 483       | 2497970.000 |           |          |          |                               |

Note: JTC = jumping to conclusions; SS = sum of squares; MS = mean square.

**Table S5.***Associations between Conspiracy Belief, Thinking Styles and the JTC-bias controlling for Age and Gender*

|                            | <i>M</i> | <i>SD</i> | 2                 | 3                  | 4                  |
|----------------------------|----------|-----------|-------------------|--------------------|--------------------|
| 1 Conspiracy Belief        | 2.63     | 0.76      | 0.361, $p < .001$ | -0.181, $p < .001$ | -0.143, $p = .005$ |
| 2 Faith in Intuition Score | 61.41    | 12.18     |                   | -0.354, $p < .001$ | -0.198, $p < .001$ |
| 3 Need for Cognition Score | 70.77    | 13.11     |                   |                    | 0.136, $p = .008$  |
| 4 JTC Draws to Decision    | 4.56     | 2.36      |                   |                    |                    |

Note. JTC = Jumping to conclusions

**Table S6.***Results of the Multiple Regression Analysis controlling for Age and Gender*

| Step | Predictor | Unstandardized coefficients |      | Standardized coefficients |       | $R^2$ | $R^2$ change | $F$    | $p$   |
|------|-----------|-----------------------------|------|---------------------------|-------|-------|--------------|--------|-------|
|      |           | $B$                         | $SE$ | $\beta$                   | $p$   |       |              |        |       |
| 1    |           |                             |      |                           |       | .020  | .020         | 4.764  | .009  |
|      | Age       | .012                        | .004 | .120                      | .009  |       |              |        |       |
|      | Gender    | .137                        | .071 | .088                      | .055  |       |              |        |       |
| 2    |           |                             |      |                           |       | .158  | .138         | 38.958 | <.001 |
|      | Age       | .015                        | .004 | .159                      | <.001 |       |              |        |       |
|      | Gender    | .040                        | .067 | .026                      | .556  |       |              |        |       |
|      | FI-score  | .022                        | .003 | .348                      | <.001 |       |              |        |       |
|      | NC-score  | -.004                       | .003 | -.073                     | .112  |       |              |        |       |

Note:  $SE$  = standard error of  $B$ ; FI = Faith in Intuition; NC = Need for Cognition

## Results of the additional analyses controlling for age and gender (total sample)

**Table S7.**

*Means and Standard Deviations of Cognitive Measures (CB, Thinking Styles) and JTC Measures*

|                           | Total sample<br>( <i>N</i> = 488) | JTC yes ( <i>n</i> = 69) | JTC no ( <i>n</i> = 419) |
|---------------------------|-----------------------------------|--------------------------|--------------------------|
|                           | <i>M</i> ( <i>SD</i> )            | <i>M</i> ( <i>SD</i> )   | <i>M</i> ( <i>SD</i> )   |
| Conspiracy Belief         | 2.64 (.77)                        | 2.58 (.74)               | 2.99 (.81)               |
| <i>Cognitive measures</i> |                                   |                          |                          |
| Faith in Intuition Scale  | 61.48 (12.20)                     | 66.41 (12.48)            | 60.67 (11.97)            |
| Need for Cognition Scale  | 70.63 (13.24)                     | 64.78 (16.27)            | 71.59 (12.43)            |
| <i>JTC measures</i>       |                                   |                          |                          |
| Draws to decision         | 4.56 (2.35)                       | 1.45 (.50)               | 5.24 (2.03)              |

Note: JTC = jumping to conclusions

**Table S8.**

*ANCOVA Results for Comparisons of Participants Regarding Conspiracy Belief*

| Results | <i>df</i> | <i>SS</i> | <i>MS</i> | <i>F</i> | <i>p</i> | <i>partial</i> $\eta^2$ |
|---------|-----------|-----------|-----------|----------|----------|-------------------------|
| Age     | 1         | 3.141     | 3.141     | 5.620    | .018     | .012                    |
| Gender  | 1         | 2.120     | 2.120     | 3.793    | .052     | .008                    |
| JTC     | 1         | 8.339     | 8.339     | 14.917   | <.001    | .030                    |
| Error   | 480       | 268.315   | .559      |          |          |                         |
| Total   | 484       | 3653.852  |           |          |          |                         |

Note: JTC = jumping to conclusions; SS = sum of squares; MS = mean square.

**Table S9.**

*ANCOVA Results for Comparisons of Participants Regarding their Preference for Intuitive Thinking (FI-score)*

| Results | <i>df</i> | <i>SS</i>   | <i>MS</i> | <i>F</i> | <i>p</i> | <i>partial</i> $\eta^2$ |
|---------|-----------|-------------|-----------|----------|----------|-------------------------|
| Age     | 1         | 730.146     | 730.146   | 5.162    | .024     | .011                    |
| Gender  | 1         | 1089.429    | 1089.429  | 7.703    | .006     | .016                    |
| JTC     | 1         | 1959.371    | 1959.371  | 13.853   | <.001    | .028                    |
| Error   | 484       | 68455.520   | 141.437   |          |          |                         |
| Total   | 488       | 1916847.000 |           |          |          |                         |

Note: JTC = jumping to conclusions; SS = sum of squares; MS = mean square.

**Table S10.**

*ANCOVA Results for Comparisons of Participants Regarding their Preference for Analytic Thinking (NC-score)*

| Results | <i>df</i> | <i>SS</i>   | <i>MS</i> | <i>F</i> | <i>p</i> | <i>partial</i> $\eta^2$ |
|---------|-----------|-------------|-----------|----------|----------|-------------------------|
| Age     | 1         | 1103.112    | 1103.112  | 6.760    | .010     | .014                    |
| Gender  | 1         | 2141.265    | 2141.265  | 13.123   | <.001    | .026                    |
| JTC     | 1         | 2720.652    | 2720.652  | 16.673   | <.001    | .033                    |
| Error   | 484       | 78976.717   | 163.175   |          |          |                         |
| Total   | 488       | 2519604.000 |           |          |          |                         |

Note: JTC = jumping to conclusions; SS = sum of squares; MS = mean square.

**Table S11.***Associations between Conspiracy Belief, Thinking Styles and the JTC-bias controlling for Age and Gender*

|                            | <i>M</i> | <i>SD</i> | 2                 | 3                  | 4                  |
|----------------------------|----------|-----------|-------------------|--------------------|--------------------|
| 1 Conspiracy Belief        | 2.64     | 0.77      | 0.370, $p < .001$ | -0.192, $p < .001$ | -0.143, $p = .005$ |
| 2 Faith in Intuition Score | 61.44    | 12.17     |                   | -0.333, $p < .001$ | -0.198, $p < .001$ |
| 3 Need for Cognition Score | 70.70    | 13.13     |                   |                    | 0.139, $p = .006$  |
| 4 JTC Draws to Decision    | 4.56     | 2.36      |                   |                    |                    |

Note. JTC = Jumping to conclusions

**Table S12.***Results of the Multiple Regression Analysis controlling for Age and Gender*

| Step | Predictor           | Unstandardized coefficients |      | Standardized coefficients |       | $R^2$ | $R^2$ change | $F$    | $p$   |
|------|---------------------|-----------------------------|------|---------------------------|-------|-------|--------------|--------|-------|
|      |                     | $B$                         | $SE$ | $\beta$                   | $p$   |       |              |        |       |
| 1    |                     |                             |      |                           |       | .024  | .024         | 3.890  | .009  |
|      | Age                 | .012                        | .004 | .120                      | .008  |       |              |        |       |
|      | Male <sup>1</sup>   | -.537                       | .344 | -.345                     | .119  |       |              |        |       |
|      | Female <sup>1</sup> | -.400                       | .343 | -.258                     | .243  |       |              |        |       |
| 2    |                     |                             |      |                           |       | .163  | .139         | 39.772 | <.001 |
|      | Age                 | .016                        | .004 | .158                      | <.001 |       |              |        |       |
|      | Male <sup>1</sup>   | -.374                       | .320 | -.240                     | .243  |       |              |        |       |
|      | Female <sup>1</sup> | -.336                       | .318 | -.217                     | .292  |       |              |        |       |
|      | FI-score            | .022                        | .003 | .346                      | <.001 |       |              |        |       |
|      | NC-score            | -.005                       | .003 | -.078                     | .087  |       |              |        |       |

Note.  $SE$  = standard error of  $B$ ; FI = Faith in Intuition; NC = Need for Cognition, 1 = gender was dummy-coded and subdivided into two genders, persons defining as male would be coded as male = 1 and female = 0, persons defining themselves as female would be coded as male = 0 and female = 1, persons defining themselves as diverse were coded as male = 0, female = 0
